# Supplementary material
Source: PubMed Central journal article supplement (PMC3010207)

A

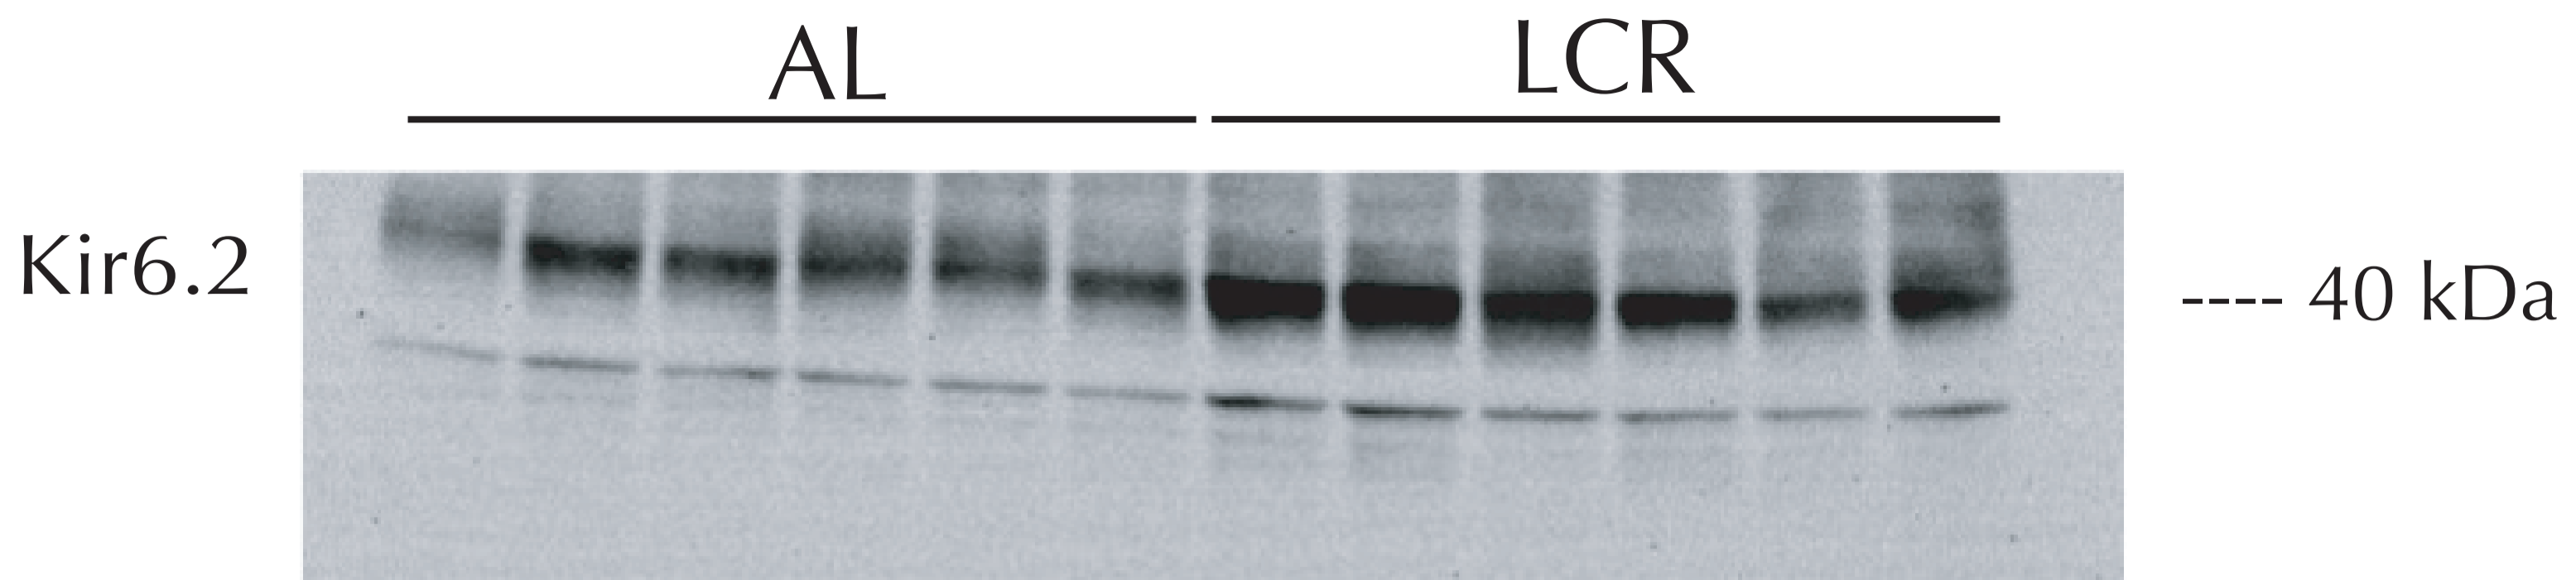

B

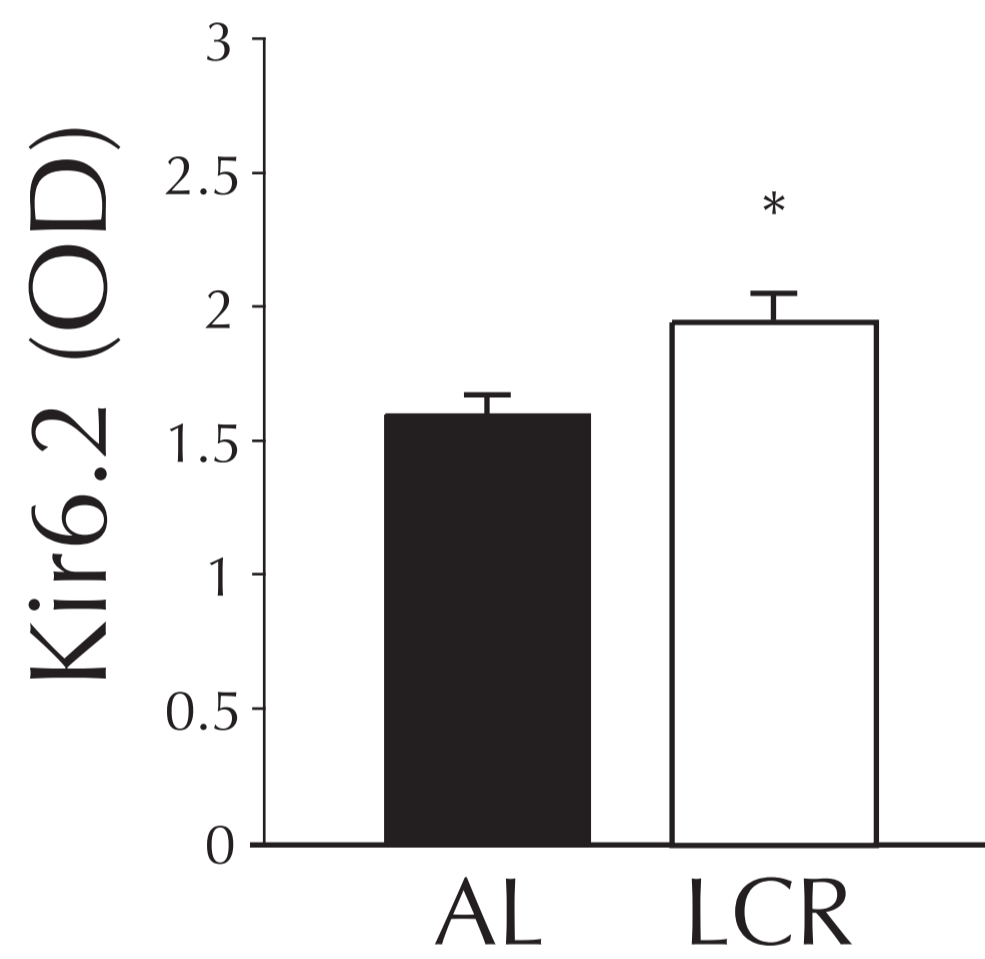

Supplement: NIHMS251652-supplement-01.pdf [file NIHMS251652-supplement-01.pdf]
